# Supplementary material
Source: HighWire-hosted journal article supplement (https://jnnp.bmj.com/content/89/12/1320)

**(A) Percentage of patients on Sodium Valproate monotherapy of all AED treated patients**

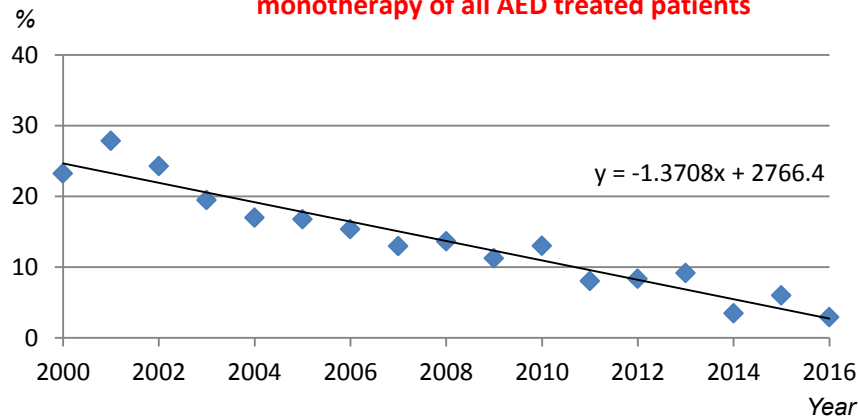

**(B) Percentage of patients on Lamotrigine monotherapy of all AED treated patients**

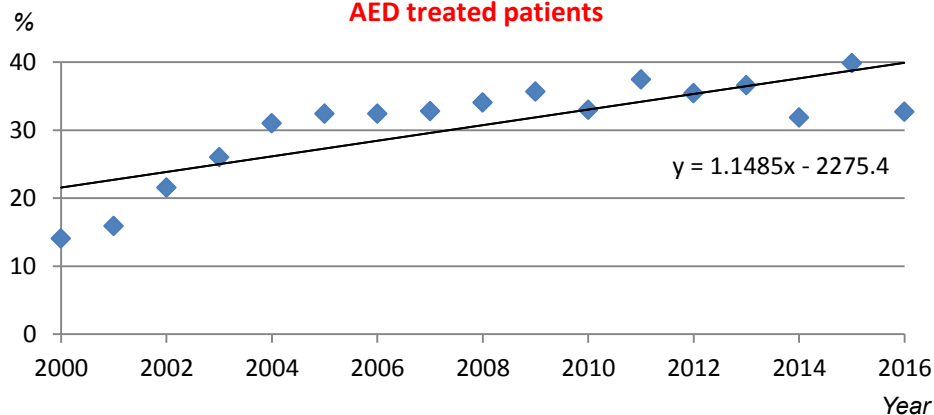

**(C) Percentage of patients on Carbamazepine monotherapy of all AED treated patients**

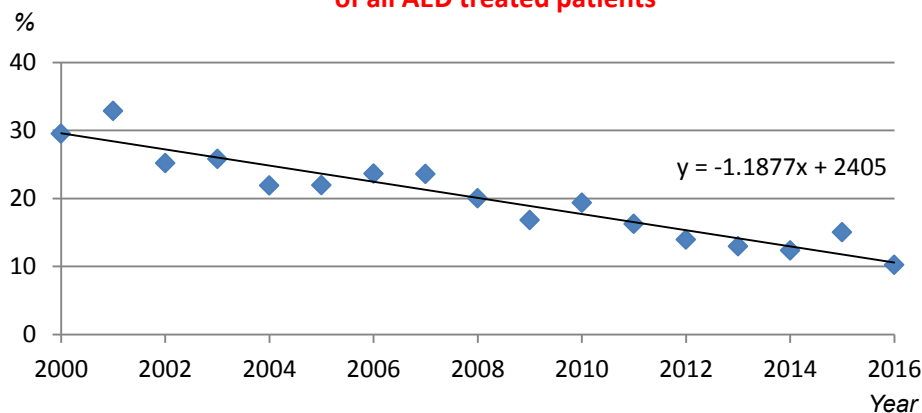

**(D) Percentage of patients on Miscellaneous monotherapy AEDs of all AED treated patients**

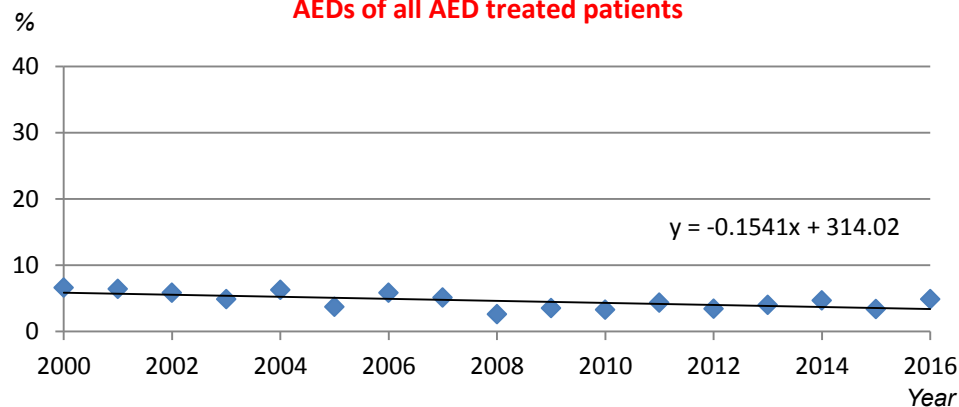

**(E) Percentage of patients on Levetiracetam monotherapy of all AED treated patients**

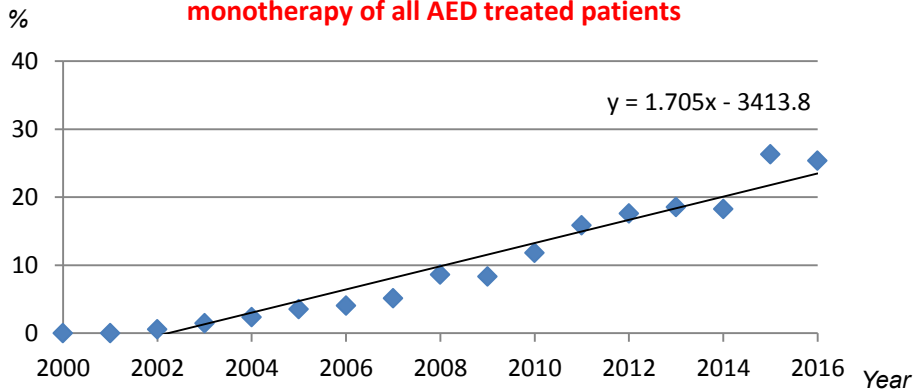

**(F) Percentage of patients on Polytherapy AEDs of all AED treated patients**

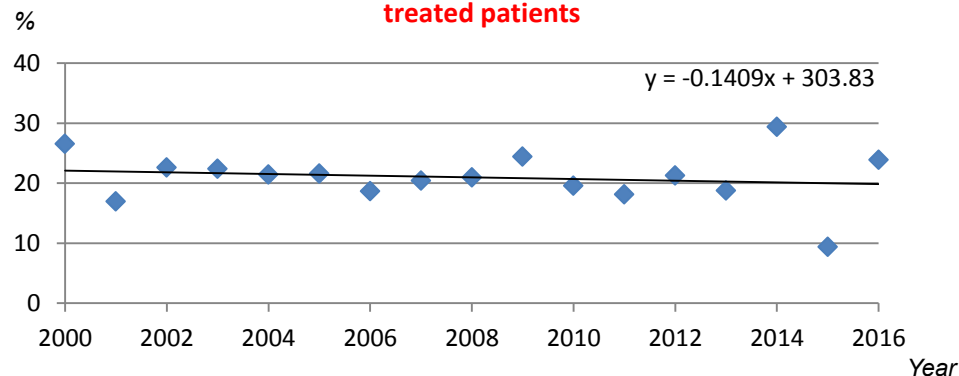

Supplement: inline-supplementary-material-2 [file inline-supplementary-material-2.pdf]
